# Supplementary material for: Autogenous Translational Regulation of the Borna Disease Virus Negative Control Factor X from Polycistronic mRNA Using Host RNA Helicases
Source: PLOS journal article supplement (doi:10.1371/journal.ppat.1000654), 2009-11-05
Supplement: S3 (10.1371/journal.ppat.1000654.s003) [file journal.ppat.1000654.s003]

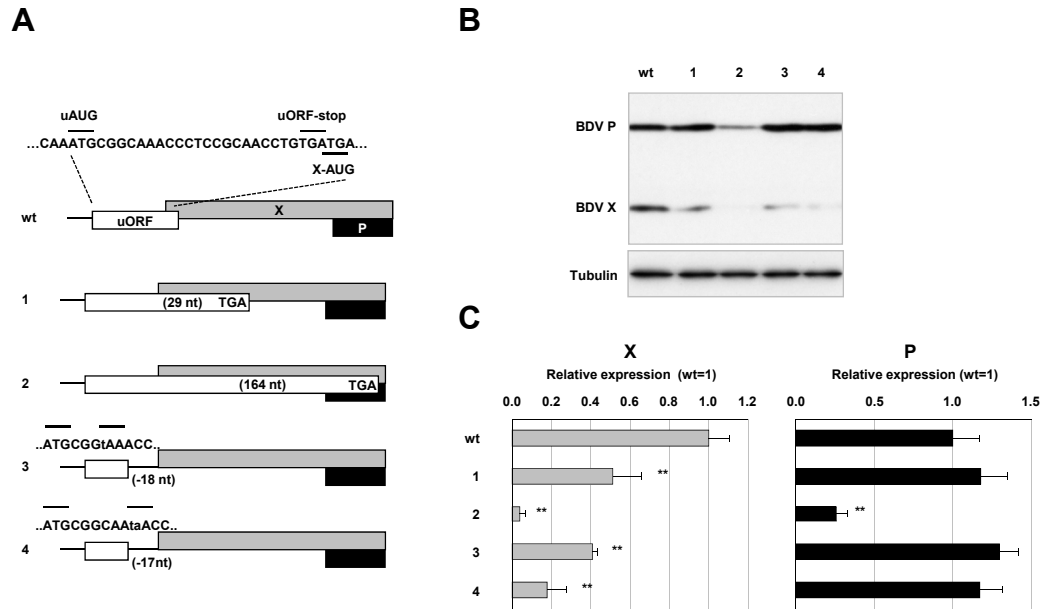

**Figure S3**

**Premature termination of uORF affects the expression of X.**

(A) Structure of uORF mutants. The nucleotide sequences substituted from the wt plasmid are indicated. These mutations do not induce structural modification of the 5' UTR of X/P mRNA. (B) Expression of BDV P and X from the mutant uORF expression plasmids. OL cells cultured in 12 well culture dishes were transfected with 0.8  $\mu$ g of wt and uORF mutant plasmids. Twelve h post-transfection, cells were lysed and subjected to western blot analysis using anti-BDV P and X antibodies. (C) Relative expression of X and P in uORF mutant plasmid-transfected OL cells. The band intensities shown in (B) were determined after quantitation by ImageJ software. The means plus S.D. of three independent experiments are shown.  $**P < 0.01$ , (Student's *t* test).
