# Supplementary material for: Autogenous Translational Regulation of the Borna Disease Virus Negative Control Factor X from Polycistronic mRNA Using Host RNA Helicases
Source: PLOS journal article supplement (doi:10.1371/journal.ppat.1000654), 2009-11-05
Supplement: S4 (10.1371/journal.ppat.1000654.s004) [file journal.ppat.1000654.s004]

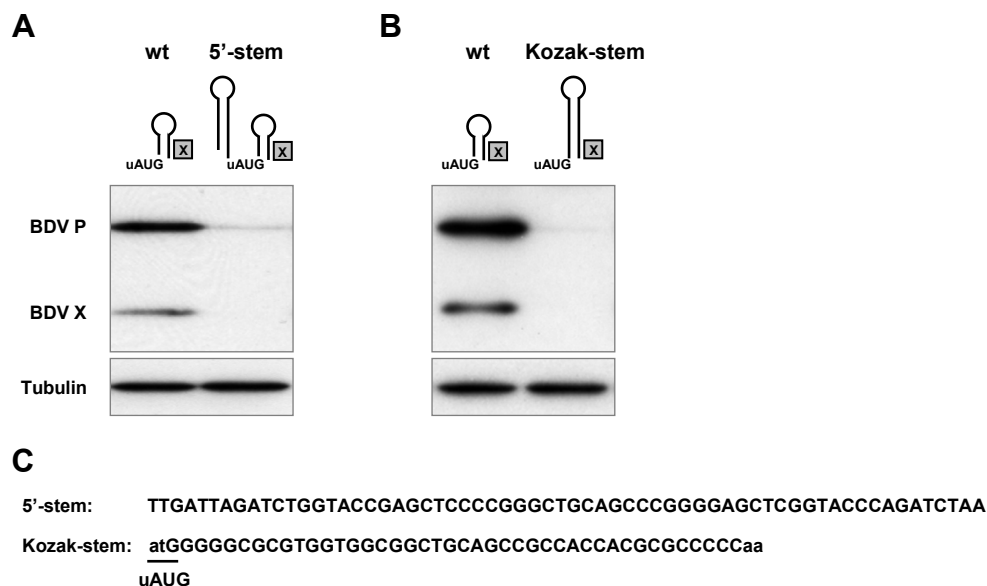

**Figure S4**

**Additional 5' or Kozak's stem-loop structures in the 5' UTR inhibit translation initiation of X and P.**

(A and B) Expression of BDV P and X from the 5' UTR mutant plasmids. Schematic structure of 5' UTR mutants is shown. The 5'-stem and Kozak-stem were introduced upstream of the uAUG and by replacing with uORF coding sequence, respectively. OL cells cultured in 12-well culture dishes were transfected with 0.8  $\mu$ g of each plasmid. Forty-eight h post-transfection, cells were lysed and subjected to western blot analysis using anti-BDV P and X antibodies. (C) Nucleotide sequences of artificial stem structures.
